# Supplementary material
Source: HighWire-hosted journal article supplement (https://bmjopen.bmj.com/content/10/8/e036976)
Supplement: inline-supplementary-material-1 [file inline-supplementary-material-1.pdf]

## Supplementary materials

### Low-density lipoprotein cholesterol and all-cause mortality: findings from the China Health and Retirement Longitudinal Study

Liang Zhou <sup>1</sup>, Ying Wu <sup>2</sup>, Shaobo Yu <sup>3</sup>, Yueping Shen <sup>4</sup> and Chaofu Ke <sup>4</sup>

<sup>1</sup> Liyang Center for Disease Control and Prevention, 55 Nanhuan Road, Liyang 213371, P. R. China.

<sup>2</sup> State Key Laboratory of Organ Failure Research, Department of Biostatistics, Guangdong Provincial Key Laboratory of Tropical Disease Research, School of Public Health, Southern Medical University, Guangzhou 510515, China.

<sup>3</sup> Medical College of Soochow University, Suzhou 215123, P. R. China.

<sup>4</sup> Department of Epidemiology and Biostatistics, School of Public Health, Medical College of Soochow University, 199 Renai Road, Suzhou 215123, P. R. China.

Supplementary Table S1 Associations between all-cause mortality and LDL-C<sup>#</sup>

|              | Total | Deaths<br>(%) | Unadjusted         |         | Adjusted*          |         |
|--------------|-------|---------------|--------------------|---------|--------------------|---------|
|              |       |               | HR (95%CI)         | P value | HR (95%CI)         | P value |
| <b>Men</b>   |       |               |                    |         |                    |         |
| Q1           | 866   | 75 (8.66)     | 1                  | -       | 1                  | -       |
| Q2           | 1008  | 67(6.65)      | 0.750(0.539~1.042) | 0.0865  | 0.863(0.551~1.351) | 0.5180  |
| Q3           | 991   | 57(5.75)      | 0.653(0.463~0.922) | 0.0155  | 0.833(0.531~1.307) | 0.4261  |
| Q4           | 1004  | 47(4.68)      | 0.531(0.368~0.764) | 0.0007  | 0.643(0.399~1.036) | 0.0698  |
| Q5           | 987   | 46(4.66)      | 0.524(0.363~0.756) | 0.0006  | 0.861(0.533~1.390) | 0.5406  |
| <b>Women</b> |       |               |                    |         |                    |         |
| Q1           | 1025  | 46 (4.49)     | 1                  | -       | 1                  | -       |
| Q2           | 1102  | 49(4.45)      | 0.998(0.667~1.492) | 0.9920  | 1.231(0.735~2.062) | 0.4290  |
| Q3           | 1096  | 29(2.65)      | 0.587(0.369~0.935) | 0.0248  | 0.619(0.340~1.127) | 0.1167  |
| Q4           | 1111  | 41(3.69)      | 0.822(0.540~1.253) | 0.3628  | 0.840(0.480~1.472) | 0.5430  |
| Q5           | 1106  | 48(4.34)      | 0.962(0.642~1.441) | 0.8511  | 0.939(0.548~1.609) | 0.8180  |

<sup>#</sup>Participants with LDL-C < 50 mg/dL were excluded.

\*Adjusted for age, smoking, drinking, BMI, living alone, household income, educational level, rural residence, ADL disability, hand grip strength, HDL-C, triglyceride, hemoglobin, hypertension, HBS/diabetes, history of stroke, cancer, heart disease, lung disease, liver disease, kidney disease, digestive disease, asthma, arthritis, psychological problem and memory problem.

Supplementary Table S2 Analyses of interactions between LDL-C and potential risk factors

| ID | Interaction term              | <i>P</i> value in men | <i>P</i> value in women |
|----|-------------------------------|-----------------------|-------------------------|
| 1  | LDL-C*age                     | 0.7323                | 0.0931                  |
| 2  | LDL-C*obesity (BMI $\geq$ 28) | 0.4033                | 0.4825                  |
| 3  | LDL-C*rural residence         | 0.1426                | 0.8102                  |
| 4  | LDL-C*ADL disability          | 0.4108                | 0.5052                  |
| 5  | LDL-C*smoking                 | 0.6150                | 0.0498                  |
| 6  | LDL-C*drinking                | 0.8680                | 0.4018                  |
| 7  | LDL-C*hypertension            | 0.7685                | 0.8919                  |
| 8  | LDL-C*diabetes                | 0.7151                | 0.1260                  |
| 9  | LDL-C*heart disease           | 0.8480                | 0.9988                  |
| 10 | LDL-C*stroke                  | 0.1101                | 0.3961                  |
| 11 | LDL-C*cancer                  | 0.6451                | 0.6695                  |
| 12 | LDL-C*lung disease            | 0.6657                | 0.4847                  |
| 13 | LDL-C*memory disease          | 0.6225                | 0.4887                  |
| 14 | LDL-C*kidney disease          | 0.1251                | 0.1876                  |
| 15 | LDL-C*arthritis               | 0.4297                | 0.1671                  |
| 16 | LDL-C*asthma                  | 0.4187                | 0.4779                  |
| 17 | LDL-C*liver disease           | 0.6929                | 0.7013                  |
| 18 | LDL-C*digestive disease       | 0.1048                | 0.4019                  |
| 19 | LDL-C*psychological disease   | 0.4605                | 0.3731                  |

Supplementary Table S3 Associations between all-cause mortality and LDL-C<sup>#</sup>

|              | Total | Deaths<br>(%) | Unadjusted         |         | Adjusted*          |         |
|--------------|-------|---------------|--------------------|---------|--------------------|---------|
|              |       |               | HR (95%CI)         | P value | HR (95%CI)         | P value |
| <b>Men</b>   |       |               |                    |         |                    |         |
| Q1           | 972   | 69 (7.10)     | 1                  | -       | 1                  | -       |
| Q2           | 999   | 58 (5.81)     | 0.806(0.568~1.142) | 0.2251  | 0.921(0.582~1.457) | 0.7236  |
| Q3           | 979   | 45 (4.60)     | 0.642(0.441~0.934) | 0.0205  | 0.762(0.472~1.231) | 0.2668  |
| Q4           | 992   | 35 (3.53)     | 0.491(0.327~0.737) | 0.0006  | 0.566(0.337~0.951) | 0.0315  |
| Q5           | 982   | 41 (4.18)     | 0.579(0.394~0.853) | 0.0056  | 0.841(0.510~1.386) | 0.4970  |
| <b>Women</b> |       |               |                    |         |                    |         |
| Q1           | 1106  | 44 (3.98)     | 1                  | -       | 1                  | -       |
| Q2           | 1094  | 41 (3.75)     | 0.951(0.622~1.456) | 0.8177  | 1.171(0.683~2.005) | 0.5660  |
| Q3           | 1094  | 27 (2.47)     | 0.622(0.385~1.005) | 0.0523  | 0.648(0.350~1.198) | 0.1664  |
| Q4           | 1105  | 35 (3.17)     | 0.799(0.513~1.246) | 0.3222  | 0.815(0.454~1.462) | 0.4924  |
| Q5           | 1099  | 41 (3.73)     | 0.934(0.610~1.430) | 0.7538  | 0.910(0.519~1.596) | 0.7424  |

<sup>#</sup>Participants who died during the first year were excluded.

\*Adjusted for age, smoking, drinking, BMI, living alone, household income, educational level, rural residence, ADL disability, hand grip strength, HDL-C, triglyceride, hemoglobin, hypertension, HBS/diabetes, history of stroke, cancer, heart disease, lung disease, liver disease, kidney disease, digestive disease, asthma, arthritis, psychological problem and memory problem.

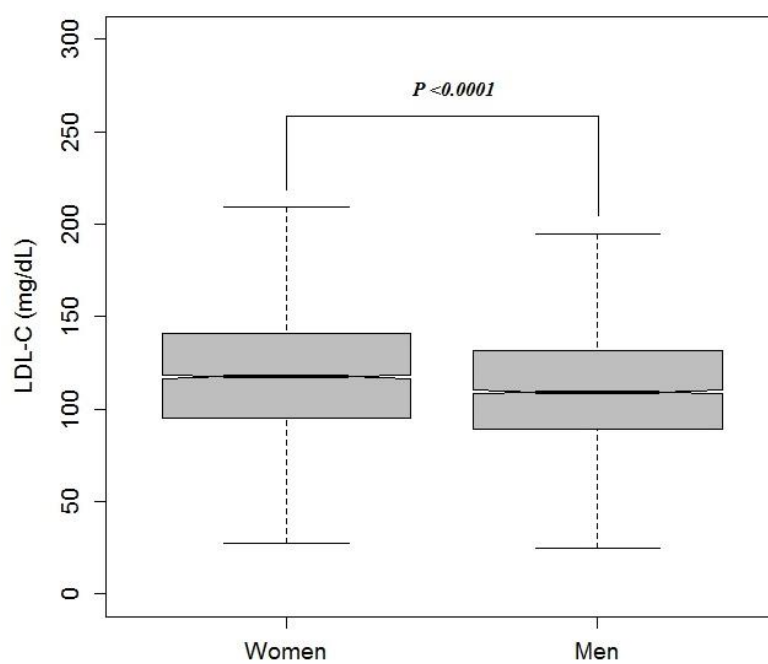

Supplementary Figure S1 The box-plot of plasma LDL-C levels in middle-aged and elderly Chinese men and women.

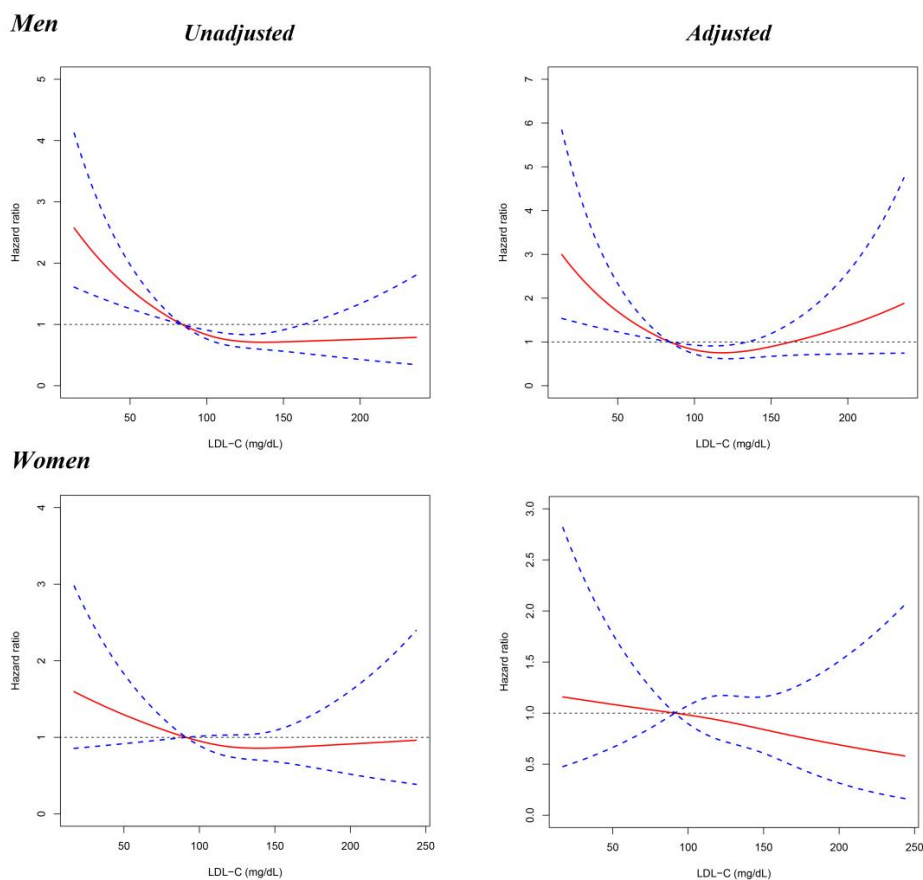

Supplementary Figure S2 Results from restricted cubic splines for the association between LDL-C and 4-year all-cause mortality in men and women (excluding participants who died during the first year). The multivariable models were adjusted for age, smoking, drinking, BMI, living alone, household income, educational level, rural residence, ADL disability, hand grip strength, HDL-C, triglyceride, hemoglobin, hypertension, HBS/diabetes, history of stroke, cancer, heart disease, lung disease, liver disease, kidney disease, digestive disease, asthma, arthritis, psychological problem and memory problem.
